# Supplementary material for: Microbial Load and Antibiotic Resistance of Escherichia coli and Staphylococcus aureus Isolated from Ready-to-Eat (RTE) Khebab Sold on a University Campus and Its Environs in Ghana
Source: Hindawi journal article supplement (doi:10.1155/2021/8622903), 2021-12-29
Supplement: f1 [file 8622903.f1.docx]

| **Raw data on MPN for E. coil from Beef , chevon and gizzardkhebabs** | | | | |
| --- | --- | --- | --- | --- |
| Location | Vendor | Beef | Chevon | Gizzard |
| Kotei | unique | 5.361728 | 5.361728 | 6.633468456 |
| Kotei | unique | 5.361728 | 5.361728 | 6.633468456 |
| Kotei | unique | 0 | 0 | 5.361727836 |
| kotei | down | 5.968483 | 6.380211 | 6.176091259 |
| kotei | down | 5.954243 | 6.361728 | 6.176091259 |
| kotei | down | 0 | 0 | 5.633468456 |
| Ayeduase | salvation | 6.322219 | 6.968483 | 6.380211242 |
| Ayeduase | salvation | 6.322219 | 6.954243 | 6.361727836 |
| Ayeduase | salvation | 5.361728 | 0 | 5.361727836 |
| Ayeduase | splender | 5.342423 | 6.380211 | 0 |
| Ayeduase | splender | 5.361728 | 6.361728 | 0 |
| Ayeduase | splender | 4.954243 | 0 | 4.968482949 |
| Boadi | stand one | 0 | 0 | 0 |
| Boadi | stand one | 0 | 0 | 0 |
| Boadi | stand one | 5.361728 | 5.968483 | 5.380211242 |
| Boadi | stand two | 0 | 0 | 0 |
| Boadi | stand two | 0 | 0 | 0 |
| Boadi | stand two | 5.361728 | 5.954243 | 5.380211242 |
| KNUST Campus | queens | 6.380211 | 6.633468 | 6.176091259 |
| KNUST Campus | queens | 6.361728 | 6.60206 | 6.176091259 |
| KNUST Campus | queens | 0 | 0 | 0 |
| KNUST Campus | africa | 5.361728 | 5.361728 | 5.968482949 |
| KNUST Campus | africa | 5.361728 | 5.361728 | 5.954242509 |
| KNUST Campus | africa | 0 | 0 | 0 |
| Tech-junction | stand A | 6.380211 | 6.380211 | 6.176091259 |
| Tech-junction | stand A | 6.361728 | 6.361728 | 6.176091259 |
| Tech-junction | stand A | 5.361728 | 0 | 0 |
| Tech-junction | stand B | 6.633468 | 6.380211 | 6.968482949 |
| Tech-junction | stand B | 6.60206 | 6.361728 | 6.954242509 |
| Tech-junction | stand B | 5.361728 | 0 | 0 |
| Kentinkrono | kent A | 0 | 6.968483 | 7.462397998 |
| Kentinkrono | kent A | 0 | 6.954243 | 7.462397998 |
| Kentinkrono | kent A | 0 | 0 | 0 |
| Kentinkrono | kent B | 5.968483 | 6.322219 | 0 |
| Kentinkrono | kent B | 5.954243 | 6.322219 | 0 |
| Kentinkrono | kent B | 0 | 0 | 0 |

| **Raw data on TVC for S. aureus from Beef , chevon and gizzardkhebabs** | | | | |
| --- | --- | --- | --- | --- |
| Location | Vendor | Beef | Chevon | Gizzard |
| Kotei | unique | 2.491361694 | 4.146128036 | 4.181843588 |
| Kotei | unique | 3.531478917 | 4.568201724 | 4.225309282 |
| Kotei | unique | 3.093421685 | 3.799340549 | 5.612783857 |
| kotei | down | 6.158362492 | 3.716003344 | 6.181843588 |
| kotei | down | 5.662757832 | 3.556302501 | 6.544068044 |
| kotei | down | 3.602059991 | 4.338456494 | 5.491361694 |
| Ayeduase | salvation | 3.982271233 | 5.982271233 | 6.10720997 |
| Ayeduase | salvation | 3.806179974 | 6.146128036 | 6.225309282 |
| Ayeduase | salvation | 4.049218023 | 4.681241237 | 3.748188027 |
| Ayeduase | splender | 7.447158031 | 7.459392488 | 6.471291711 |
| Ayeduase | splender | 7.471291711 | 7.414973348 | 6.434568904 |
| Ayeduase | splender | 3.973127854 | 4.380211242 | 3.62324929 |
| Boadi | stand one | 6.46834733 | 5.10720997 | 6.120573931 |
| Boadi | stand one | 6.428134794 | 4.093421685 | 6.133538908 |
| Boadi | stand one | 6.217483944 | 6.079181246 | 6.245512668 |
| Boadi | stand two | 3.568201724 | 3.556302501 | 5.093421685 |
| Boadi | stand two | 3.681241237 | 3.944482672 | 5.133538908 |
| Boadi | stand two | 6.214843848 | 6.158362492 | 6.093421685 |
| KNUST Campus | queens | 6.643452676 | 7.079181246 | 5.602059991 |
| KNUST Campus | queens | 5.653212514 | 6.991226076 | 5.806179974 |
| KNUST Campus | queens | 2.982271233 | 3.653212514 | 5.326335861 |
| KNUST Campus | africa | 5.672097858 | 7.049218023 | 6.017033339 |
| KNUST Campus | africa | 5.064457989 | 5.681241237 | 6.982271233 |
| KNUST Campus | africa | 2.806179974 | 3.806179974 | 5.170261715 |
| Tech-junction | stand A | 5.806179974 | 7.181843588 | 5.334453751 |
| Tech-junction | stand A | 5.880813592 | 6.093421685 | 6.880813592 |
| Tech-junction | stand A | 5.643452676 | 6.806179974 | 6.944482672 |
| Tech-junction | stand B | 6.181843588 | 4.245512668 | 4.017033339 |
| Tech-junction | stand B | 5.982271233 | 3.662757832 | 3.86923172 |
| Tech-junction | stand B | 6.28780173 | 6.86923172 | 7.093421685 |
| Kentinkrono | kent A | 4.672097858 | 5.643452676 | 5.806179974 |
| Kentinkrono | kent A | 2.944482672 | 7.209515015 | 5.716003344 |
| Kentinkrono | kent A | 6.973127854 | 7.033423755 | 5.477121255 |
| Kentinkrono | kent B | 5.556302501 | 6.10720997 | 7.209515015 |
| Kentinkrono | kent B | 5.602059991 | 5.944482672 | 7.214843848 |
| Kentinkrono | kent B | 6.982271233 | 7.214843848 | 5.643452676 |

| **Raw data on antimicrobial susceptibility test E. coli and S. aureus isolates** | | | |
| --- | --- | --- | --- |
| Isolate | Antibiotic Disc(µg) | No. of Resistant | No. of Susceptibility |
| ***E. coli*** | Ampicillin 10 | 27 (100%) | 0 (0) |
|  | tetracycline 10 | 27 (100%) | 0 (0) |
|  | Cotrimoxazole 25 | 14 (51.85%) | 13 (48.15%) |
|  | Gentamicin 10 | 27 (100%) | 0 (0) |
|  | Cefuroxime 30 | 27 (100%) | 0 (0) |
|  | Chlorampheniol 10 | 0 (0) | 27 (100%) |
|  | Ceftriaxone 30 | 27 (100%) | 0 (0) |
|  | Cefotaxime 30 | 27 (100%) | 0 (0) |
|  |  |  |  |
| ***S. aureus*** | Penicillin 1.5i | 36 (100%) | 0 (0) |
|  | Ampecillin 10 | 35 (97.22%) | 1(2.78%) |
|  | Flucloxacillin 5 | 36 (100%) | 0 (0) |
|  | Erythromycin 5 | 27 (75%) | 9 (25%) |
|  | Tetracycline 10 | 36 (100%) | 0 (0) |
|  | Cotrimoxazole 25 | 31 (86.11%) | 5 (13.89%) |
|  | Cefuroxime30 | 36 (100%) | 0 (0) |
|  | Gentamicin 10 | 25 (69.44%) | 11(30.56%) |
